# Supplementary material for: The active structure of p-block SnNC single-atom electrocatalysts for the oxygen reduction reaction
Source: Royal Society of Chemistry journal article supplement (doi:10.1039/d2cp03362c), 2022-01-01
Supplement: d2cp03362c1.pdf [file d2cp03362c1.pdf]

## **Supporting Information**

### **The Active Structure of *p*-block SnNC Single-Atom Electrocatalysts for Oxygen Reduction Reaction**

Yuping Chen, Fang Sun and Qing Tang\*

School of Chemistry and Chemical Engineering, Chongqing Key Laboratory of  
Theoretical and Computational Chemistry, Chongqing University, Chongqing 401331,  
China.

\*To whom correspondence should be addressed. E-mail: [qingtang@cqu.edu.cn](mailto:qingtang@cqu.edu.cn)

## Computational details

The detailed pathways for classical 4e<sup>-</sup> pathway in ORR was adopted in our work as the following five steps:

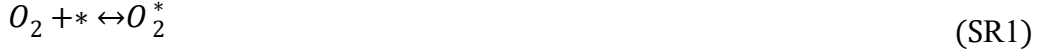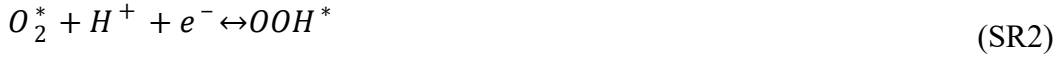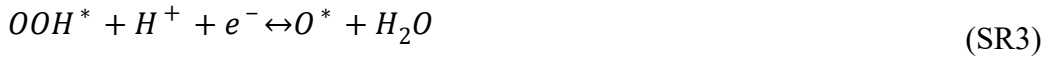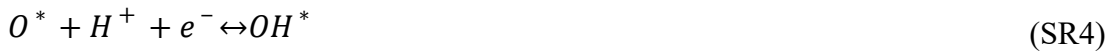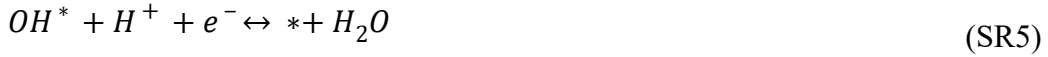

Therefore, considering the effect of electrode potential ( $U$ ), the equation of reaction free energy of reaction SR1-SR5 is given:

$$\Delta G_1 = G_{O_2^*} - G_{O_2} - G_* \quad (S1a)$$

$$\Delta G_2 = G_{OOH^*} - G_{O_2^*} - 1/2G_{H_2} + eU \quad (S1b)$$

$$\Delta G_3 = G_{O^*} + G_{H_2O} - G_{OOH^*} - 1/2G_{H_2} + eU \quad (S1c)$$

$$\Delta G_4 = G_{OH^*} - G_{O^*} - 1/2G_{H_2} + eU \quad (S1d)$$

$$\Delta G_5 = G_* + G_{H_2O} - G_{OH^*} - 1/2G_{H_2} + eU \quad (S1e)$$

Owing to the high-spin ground state of the O<sub>2</sub> molecule, the energy of triplet O<sub>2</sub> molecule is poorly described in DFT computations, consequently, the free energy of O<sub>2</sub> molecule ( $G_{O_2}$ ) is derived as  $G_{O_2} = 2G_{H_2O} - 2G_{H_2} + 4.92 \text{ eV}$ .

To calculate the adsorption free energy of oxygen intermediates (O<sub>2</sub><sup>\*</sup>, OOH<sup>\*</sup>, O<sup>\*</sup> and OH<sup>\*</sup>), the reaction free energy of eqs SR6-SR9 are calculated.

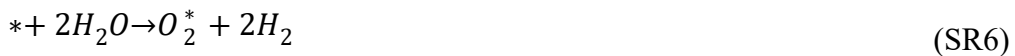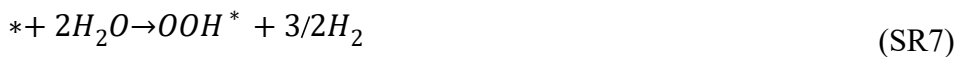

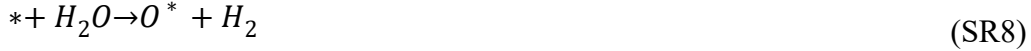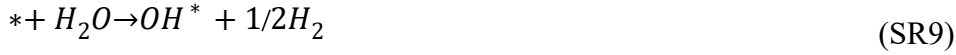

After that, the Gibbs reaction free energy of eqs SR6-SR9 can be defined as:

$$\Delta G_{O_2^*} = 2G_{H_2} + G_{O_2^*} - 2G_{H_2O} - G_* \quad (S2a)$$

$$\Delta G_{OOH^*} = 3/2G_{H_2} + G_{OOH^*} - 2G_{H_2O} - G_* \quad (S2b)$$

$$\Delta G_{O^*} = G_{O^*} + G_{H_2} - G_{H_2O} - G_* \quad (S2c)$$

$$\Delta G_{OH^*} = G_{OH^*} + 1/2G_{H_2} - G_{H_2O} - G_* \quad (S2d)$$

The detailed pathways for conventional O<sub>2</sub> dissociative mechanism (O\* mechanism)

in ORR on the SnNC surface was adopted in our work as the following six steps:

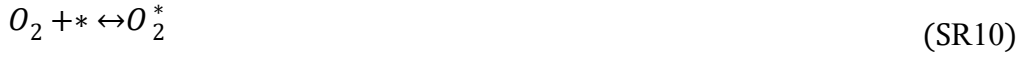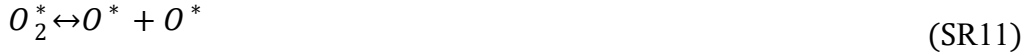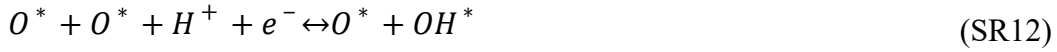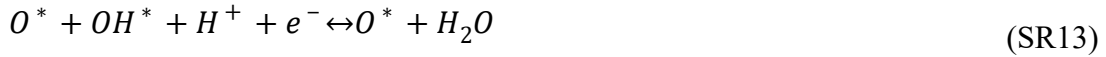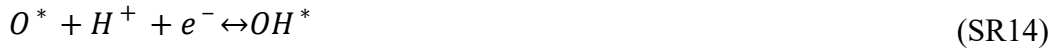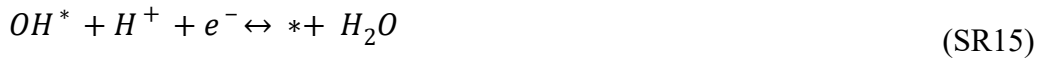

Therefore, considering the effect of electrode potential ( $U$ ), the equation of reaction free energy of reaction SR10-SR15 is given:

$$\Delta G_1 = G_{O_2^*} - G_{O_2} - G_* \quad (S3a)$$

$$\Delta G_2 = G_{O^*} + G_{O^*} - G_{O_2^*} \quad (S3b)$$

$$\Delta G_3 = G_{O^*} + G_{OH^*} - G_{O^*} + G_{O^*} - 1/2G_{H_2} + eU \quad (S3c)$$

$$\Delta G_4 = G_{O^*} + G_{H_2O} - G_{O^*} + G_{OH^*} - 1/2G_{H_2} + eU \quad (S3d)$$

$$\Delta G_5 = G_{OH^*} - G_{O^*} - 1/2G_{H_2} + eU \quad (S3e)$$

$$\Delta G_6 = G_* + G_{H_2O} - G_{OH^*} - 1/2G_{H_2} + eU \quad (S3f)$$

The detailed pathways for O<sub>2</sub> dissociative mechanism (2OH\* mechanism) in ORR on the SnNC surface was adopted in our work as the following six steps:

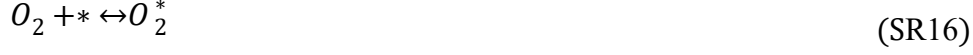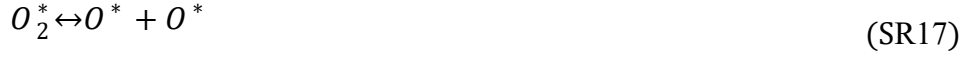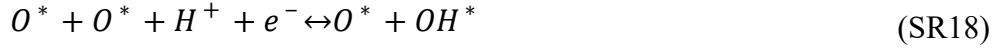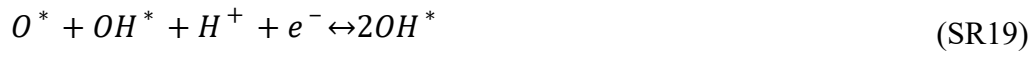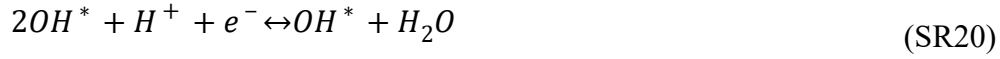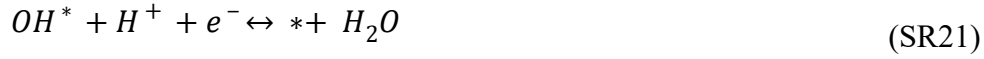

Therefore, considering the effect of electrode potential ( $U$ ), the equation of reaction free energy of reaction SR16-SR21 is given:

$$\Delta G_1 = G_{O_2^*} - G_{O_2} - G_* \quad (S4a)$$

$$\Delta G_2 = G_{O^* + O^*} - G_{O_2^*} \quad (S4b)$$

$$\Delta G_3 = G_{O^* + OH^*} - G_{O^* + O^*} - 1/2G_{H_2} + eU \quad (S4c)$$

$$\Delta G_4 = G_{2OH^*} - G_{O^* + OH^*} - 1/2G_{H_2} + eU \quad (S4d)$$

$$\Delta G_5 = G_{OH^*} + G_{H_2O} - G_{2OH^*} - 1/2G_{H_2} + eU \quad (S4e)$$

$$\Delta G_6 = G_* + G_{H_2O} - G_{OH^*} - 1/2G_{H_2} + eU \quad (S4f)$$

The detailed pathway for conventional 2e<sup>-</sup> mechanism on the SnNC surface in ORR was adopted in our work as the following three steps:

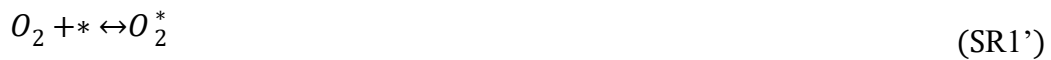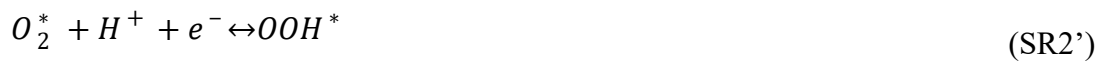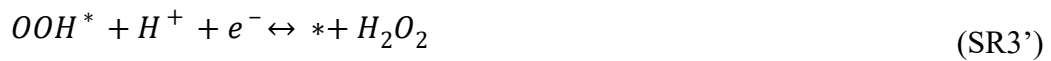

Therefore, considering the effect of electrode potential ( $U$ ), the reaction free energy of SR1'-SR3' can be calculated by:

$$\Delta G_1 = G_{O_2^*} - G_{O_2} - G_*$$
 (S5a)

$$\Delta G_2 = G_{OOH^*} - G_{O_2} - 1/2G_{H_2} + eU$$
 (S5b)

$$\Delta G_3 = G_{H_2O_2} + G_* - G_{OOH^*} - 1/2G_{H_2} + eU$$
 (S5c)

The detailed pathways for classical associative pathway on SnN<sub>3</sub>C<sub>1</sub>-O, SnN<sub>1</sub>C<sub>3</sub>-O in ORR was adopted in our work as the following five steps:

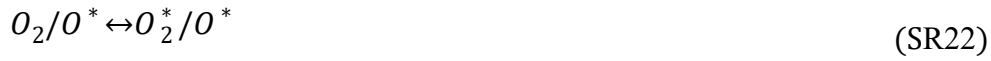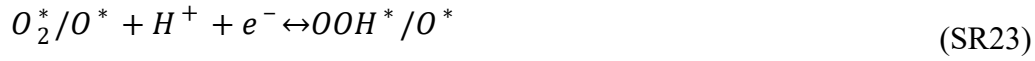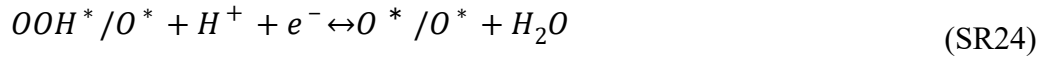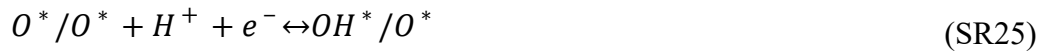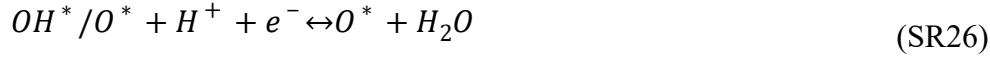

Therefore, considering the effect of electrode potential ( $U$ ), the equation of reaction free energy of reaction SR22-SR26 is given:

$$\Delta G_1 = G_{O_2^*/O^*} - G_{O_2/O^*} - G_*$$
 (S6a)

$$\Delta G_2 = G_{OOH^*/O^*} - G_{O_2^*/O^*} - 1/2G_{H_2} + eU$$
 (S6b)

$$\Delta G_2 = G_{O^*/O^*} + G_{H_2O} - G_{OOH^*/O^*} - 1/2G_{H_2} + eU$$
 (S6c)

$$\Delta G_3 = G_{OH^*/O^*} - G_{O^*/O^*} - 1/2G_{H_2} + eU$$
 (S6d)

$$\Delta G_4 = G_{O^*} + G_{H_2O} - G_{OH^*/O^*} - 1/2G_{H_2} + eU$$
 (S6e)

The detailed pathway for 2e<sup>-</sup> mechanism on SnN<sub>3</sub>C<sub>1</sub>-O, SnN<sub>1</sub>C<sub>3</sub>-O in ORR was adopted in our work as the following three steps:

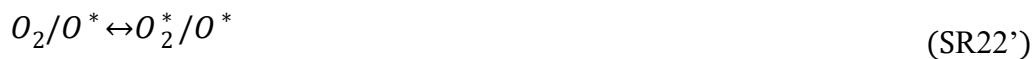

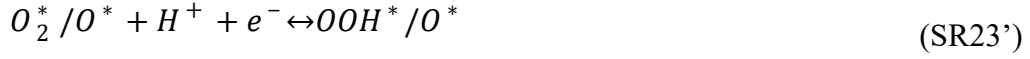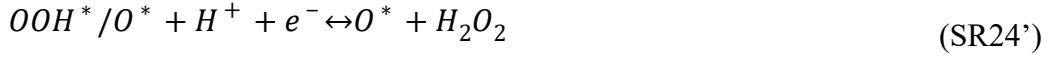

Therefore, considering the effect of electrode potential ( $U$ ), the reaction free energy of SR22'-SR24' can be calculated by:

$$\Delta G_1 = G_{O_2^*/O^*} - G_{O_2/O^*} - G_* \quad (S7a)$$

$$\Delta G_2 = G_{OO H^*/O^*} - G_{O_2^*/O^*} - 1/2G_{H_2} + eU \quad (S7b)$$

$$\Delta G_3 = G_{H_2O_2} + G_{O^*} - G_{OO H^*/O^*} - 1/2G_{H_2} + eU \quad (S7c)$$

The calculated reaction free energy for all of the elementary reactions can then be used to plot the ORR free energy diagram. According to Norskov and coworkers, the highest potential at which all the reaction steps are downhill in free energy is called the thermodynamic limiting potential ( $U_L$ ) and the difference between the equilibrium potential of  $U = 1.23$  V and the limiting potential is called the theoretical overpotential ( $\eta$ ). The theoretical limiting potential is determined by  $U_L = -\max(\Delta G_1, \Delta G_2, \Delta G_3, \Delta G_4)/e$ , and the maximum  $U_L$  of 1.23 V corresponds to zero overpotential. Besides, the elementary step with a maximum free energy change for the standard equilibrium potential has been termed the potential-determining step (PDS), which represents the unfavorable thermodynamics reaction step on the SnNC surface.

The change in reaction free energy under implicit solvation model is calculated as the following equation.

$$\Delta G_{imp} = \Delta E + \Delta E_{imp} + \Delta E_{ZPE} - T\Delta S + \Delta G_{pH} + \Delta G_U \quad (SR27)$$

Where  $\Delta E$ ,  $\Delta E_{sol}$ ,  $\Delta E_{ZPE}$ ,  $T_{\Delta S}$  donate the change in electronic energy, implicit solvation correction, zero-point energy, entropy change at  $T = 298.15K$ , respectively. Additionally,  $\Delta G_{pH}$  represents the change of free energy with the variation of  $H^+$  concentration ( $pH = 0$  under acid medium).  $\Delta G_U = -eU$  is used to express the change of free energy caused by electrode potential ( $U$ ).

The adsorption energies of the ORR intermediates in the presence of explicit water layer are calculated by replacing one water molecule from the first water layer with the adsorbate. The energy of the water molecule in the water layer structure is assumed to be the average energy of a water molecule in the water layer without adsorbate, defined as the following equation.

$$E^{WL}(H_2O) = \frac{1}{n}(E(nH_2O^*) - E(*)) \quad (SR28)$$

Where  $E^{WL}(H_2O)$  and  $n$  are the average energy of a water molecule in the water layer and the number of water molecules in the water layer, respectively.  $E(nH_2O^*)$  and  $E(*)$  are the total energy of the catalyst surface with and without water bilayers, respectively. Whenever one adsorbate is placed on the catalyst surface, one water molecule is removed from the water layer. Consequently, the adsorption energies of ORR intermediates in equation S2a-2d in the main manuscript need a slight modification. For example, the adsorption energy of  $O^*$  intermediate as the presence of water can be rewritten as the following Equation.

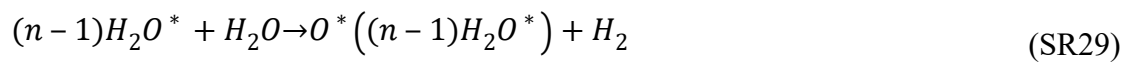

$$\Delta G^{WL}(O^*) = G(O^* ((n-1)H_2O^*)) + G(H_2) - E((n-1)H_2O^*) - G(H_2O) \quad (SR30)$$

Where  $\Delta G^{WL}(O^*)$  is the free adsorption energy of  $O^*$  intermediate with the presence of the explicit water layers.  $G(O^*(n-1)H_2O^*)$  is the total free energy of the catalyst surface with  $O^*$  adsorbate at the active site and the explicit water layers (one water molecule in the first layer is removed and replaced by  $O^*$  adsorbate, so there are only  $n-1$  water molecules left).  $G(H_2)$  and  $G(H_2O)$  are the free energy of hydrogen and water molecule, respectively.  $E((n-1)H_2O^*)$  is calculated from the following Equation.

$$E((n-1)H_2O^*) = E(nH_2O^*) - E^{WL}(H_2O) \quad (\text{SR31})$$

It is assumed that the energy of a water molecule that is removed from the water layer is equal to the average energy of a water molecule in the water layer without the adsorbate. In this approach, the total number of adsorbates plus water molecules is kept constants in all cases to avoid the situation where inserted adsorbates push water molecules away from their stable position in a well-developed water layer.

Table S1. The calculated binding energies of Sn single atom on different structure ( $E_b$ ), cohesive energies of Sn metal as reference to its bulk forms ( $E_{coh}$ ) as well as the energy difference between  $E_b$  and  $E_{coh}$  ( $\Delta E_b$ ).

| materials                                | $E_b^1$ | $\Delta E_b^3$ | $E_{coh}^2$ |
|------------------------------------------|---------|----------------|-------------|
| <b>Sn</b>                                | -       | -              | -3.34       |
| <b>SnN<sub>4</sub></b>                   | -5.10   | -1.76          | -           |
| <b>SnN<sub>3</sub>C<sub>1</sub></b>      | -5.45   | -2.11          | -           |
| <b>SnN<sub>2</sub>C<sub>2</sub>-hex</b>  | -4.79   | -1.45          | -           |
| <b>SnN<sub>2</sub>C<sub>2</sub>-pen</b>  | -5.73   | -2.39          | -           |
| <b>SnN<sub>2</sub>C<sub>2</sub>-oppo</b> | -5.95   | -2.61          | -           |
| <b>SnN<sub>1</sub>C<sub>3</sub></b>      | -4.86   | -1.52          | -           |
| <b>SnC<sub>4</sub></b>                   | -4.32   | -0.98          | -           |



${}^1E_b$  is binding energy of single Sn atom on the graphene, which is calculated through

$E_b = E_{M+substrate} - E_{substrate} - E_M$ , where the  $E_{M+substrate}$ ,  $E_{substrate}$  and  $E_M$  are the energies of Sn-N-C complex, pure substrate and metal atom (Sn).

${}^2E_{coh}$  is the cohesive energy of metal, which is calculated by,

$E_{coh} = (E_{M(bulk)} - nE_M)/n$ , where the  $E_{M(bulk)}$ ,  $n$  is the energy of metal crystal and the number of metal atom in the crystal, respectively.

${}^3\Delta E_b$  is the energy difference between  $E_b$  and  $E_{coh}$ .

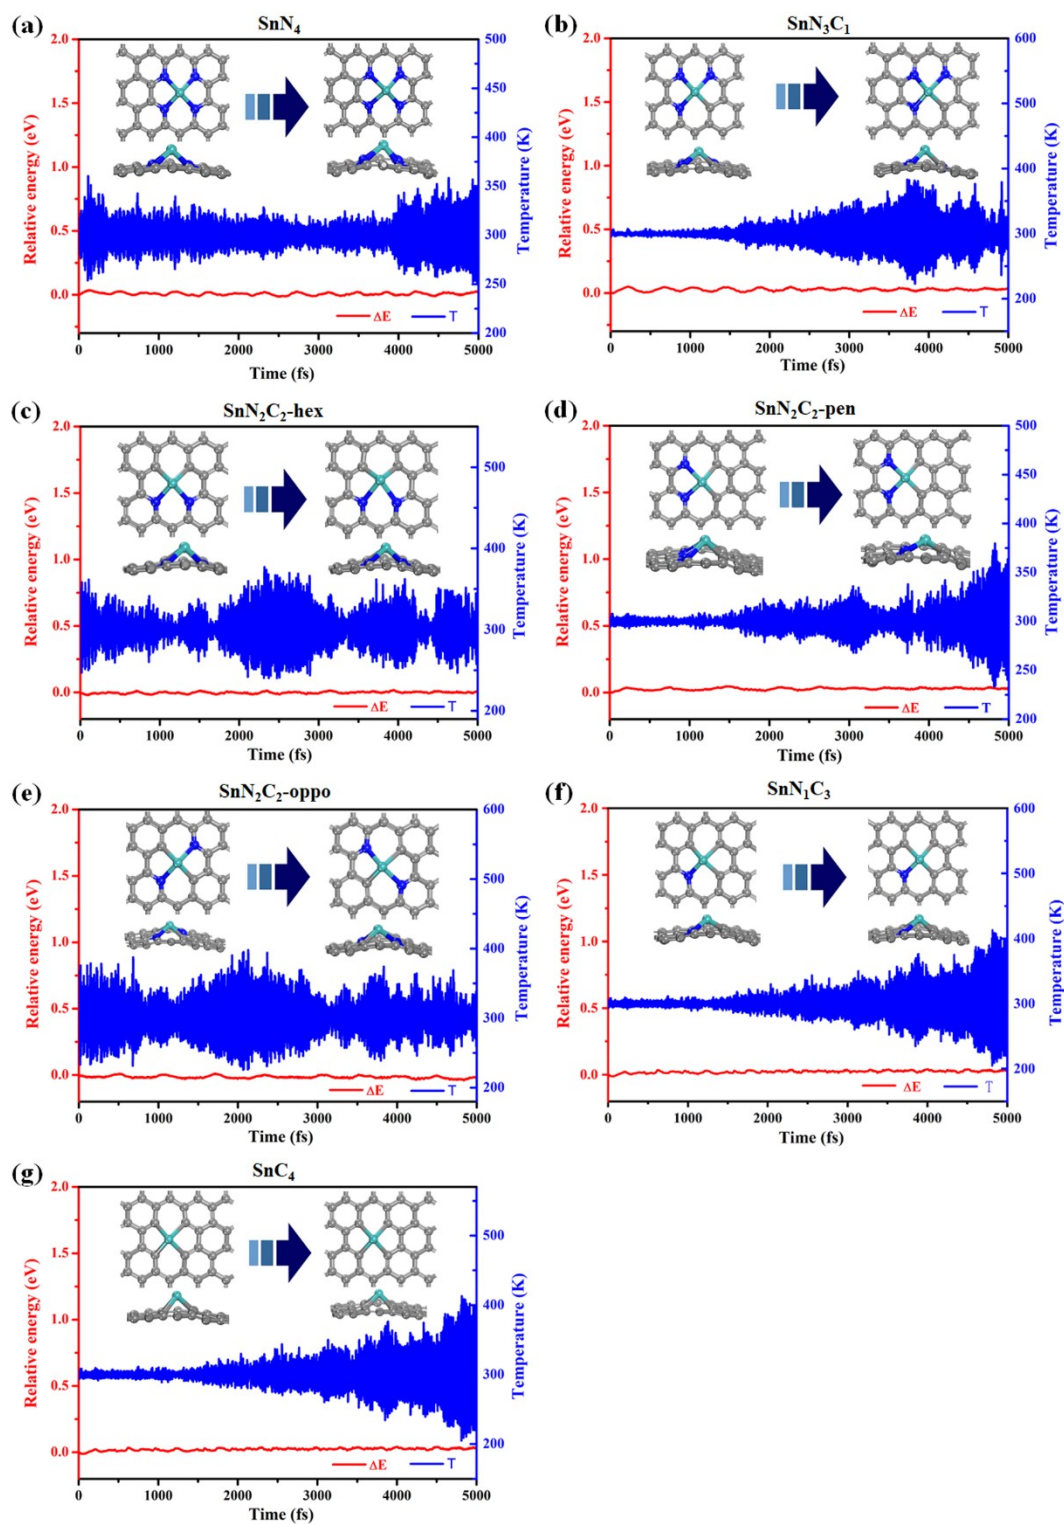

Figure S1. The AIMD simulation, the time step is 1fs and AIMD simulation is performed at 300K for 5 ps.  $\text{SnN}_4$  (a),  $\text{SnN}_3\text{C}_1$  (b),  $\text{SnN}_2\text{C}_2$ -hex (c),  $\text{SnN}_2\text{C}_2$ -pen (d),  $\text{SnN}_2\text{C}_2$ -oppo (e),  $\text{SnN}_1\text{C}_3$  (f),  $\text{SnC}_4$  (g). Here, the relative energy of the initial

configuration is set to zero for reference.

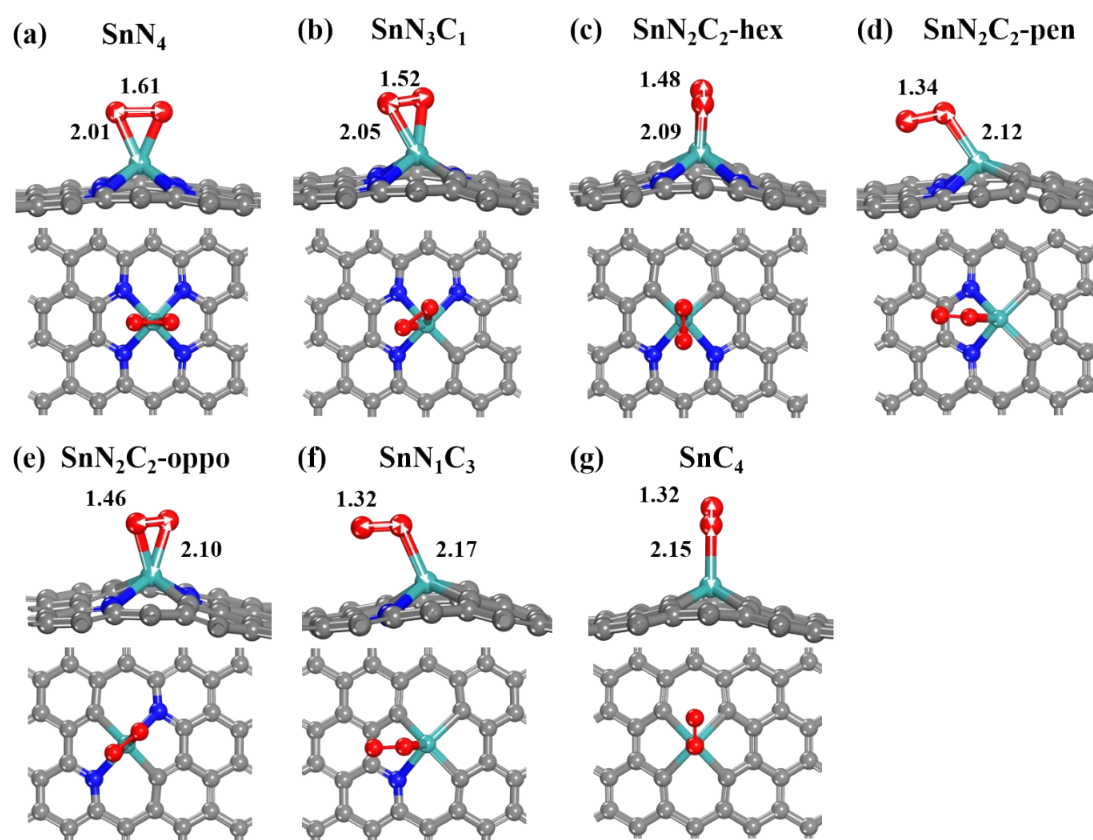

Figure S2. Top and side view of atomic structure of relaxed geometries for  $O_2$  adsorbed on the center Sn atom of the  $SnN_4$  (a),  $SnN_3C_1$  (b),  $SnN_2C_2$ -hex (c),  $SnN_2C_2$ -pen (d),  $SnN_2C_2$ -oppo (e),  $SnN_1C_3$  (f), and  $SnC_4$  (g). The gray, blue, cyan and red balls represent C, N, Sn and O atoms, respectively.

Table S2. Reaction energetics and corresponding Gibbs free activation barrier ( $G_{act}$ ) of  $O_2^*$  protonation forming  $OOH^*$  or dissociation forming  $O^*+O^*$  on SnNC catalysts at  $T = 298.15$  K,  $pH = 0$ , and  $U = 0$  V.

| Elementary reactions        | $SnN_2C_2$ -hex | $SnN_2C_2$ -pen | $SnN_2C_2$ -oppo |
|-----------------------------|-----------------|-----------------|------------------|
| $O_2^* \rightarrow O^*+O^*$ | -2.20           | -2.40           | -1.77            |

|                                   |                                 |                  |                                 |
|-----------------------------------|---------------------------------|------------------|---------------------------------|
| <i>Gact</i>                       | 1.36                            | 1.71             | 1.45                            |
| $O_2^*+H^++e^- \rightarrow OOH^*$ | -0.99                           | -0.96            | -1.11                           |
| <i>Gact</i>                       | 0.60                            | 0.90             | 0.62                            |
| <b>Elementary reactions</b>       | SnN <sub>4</sub>                | SnC <sub>4</sub> | SnN <sub>3</sub> C <sub>1</sub> |
| $O_2^* \rightarrow O^*+O^*$       | -0.32                           | -1.38            | -1.87                           |
| <i>Gact</i>                       | 0.63                            | 0.79             | 0.92                            |
| $O_2^*+H^++e^- \rightarrow OOH^*$ | -0.37                           | -1.03            | -1.84                           |
| <i>Gact</i>                       | 2.53                            | 1.91             | 1.41                            |
| <b>Elementary reactions</b>       | SnN <sub>1</sub> C <sub>3</sub> |                  |                                 |
| $O_2^* \rightarrow O^*+O^*$       | -1.69                           |                  |                                 |
| <i>Gact</i>                       | 1.00                            |                  |                                 |
| $O_2^*+H^++e^- \rightarrow OOH^*$ | -2.76                           |                  |                                 |
| <i>Gact</i>                       | 1.12                            |                  |                                 |

Table S3. Reaction energetics (eV) of OOH\* protonation forming O\*+H<sub>2</sub>O or dissociation forming O\*+OH\* on SnN<sub>2</sub>C<sub>2</sub>-hex, SnN<sub>2</sub>C<sub>2</sub>-pen, SnN<sub>2</sub>C<sub>2</sub>-oppo, SnN<sub>3</sub>C<sub>1</sub>-O and SnN<sub>1</sub>C<sub>3</sub>-O at  $T = 298.15$  K,  $pH = 0$ , and  $U = 0$  V.

| <b>Elementary reactions</b>             | SnN <sub>2</sub> C <sub>2</sub> -hex | SnN <sub>2</sub> C <sub>2</sub> -pen | SnN <sub>2</sub> C <sub>2</sub> -oppo |
|-----------------------------------------|--------------------------------------|--------------------------------------|---------------------------------------|
| $OOH^*+H^++e^- \rightarrow O^*+H_2O(l)$ | -2.08                                | -1.73                                | -2.75                                 |
| $OOH^* \rightarrow O^*+OH^*$            | -0.17                                | -0.29                                | 0.00                                  |
| <b>Elementary reactions</b>             | SnN <sub>3</sub> C <sub>1</sub> -O   | SnN <sub>1</sub> C <sub>3</sub> -O   |                                       |
| $OOH^*+H^++e^- \rightarrow O^*+H_2O(l)$ | -1.38                                | -1.17                                |                                       |
| $OOH^* \rightarrow O^*+OH^*$            | -0.86                                | 0.72                                 |                                       |

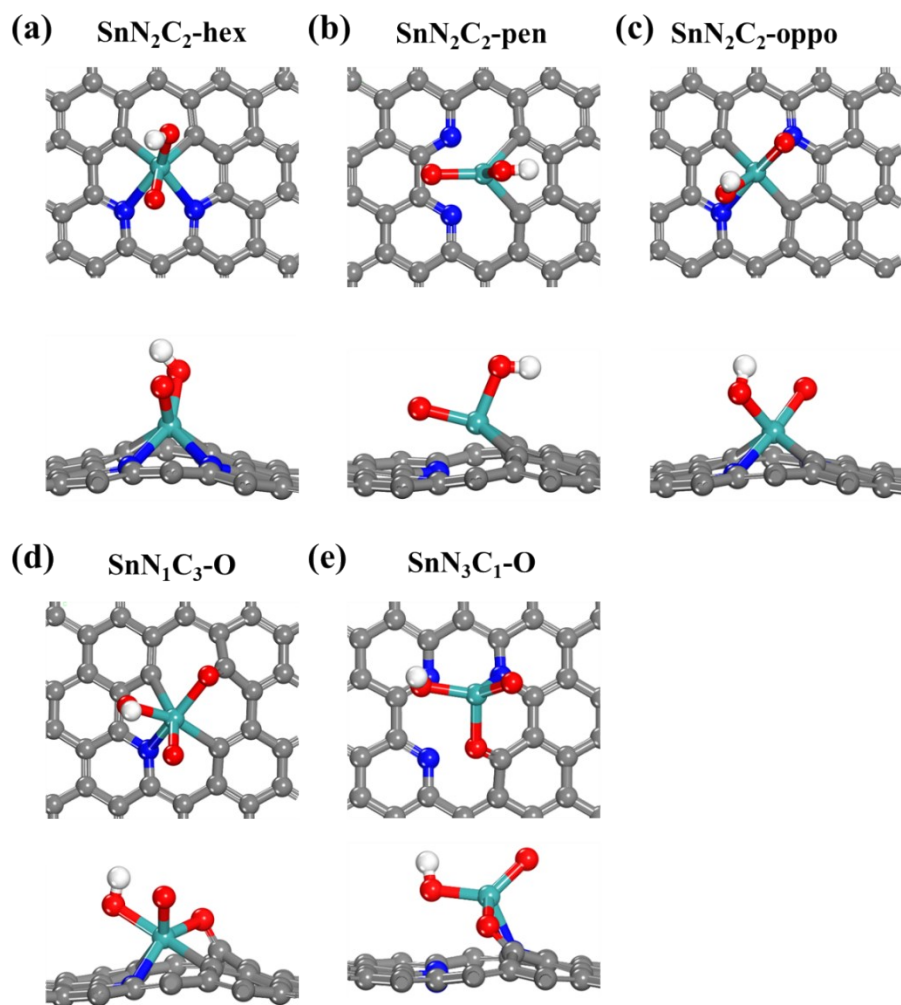

Figure S3. Top and side view of atomic structure of relaxed geometries for  $\text{O}^*-\text{OH}^*$  adsorbed on the center Sn atom of the  $\text{SnN}_2\text{C}_2$ -hex (a),  $\text{SnN}_2\text{C}_2$ -pen (b),  $\text{SnN}_2\text{C}_2$ -oppo (c),  $\text{SnN}_1\text{C}_3$ -O (d), and  $\text{SnN}_3\text{C}_1$ -O (e). The gray, blue, cyan and red balls represent C, N, Sn and O atoms, respectively.

Table S4. Reaction energetics (eV) of  $\text{OOH}^*$  protonation forming  $\text{O}^*+\text{H}_2\text{O}$  or  $\text{H}_2\text{O}_2$  ( $4e^-$  or  $2e^-$  pathway) on  $\text{SnN}_2\text{C}_2$ -hex,  $\text{SnN}_2\text{C}_2$ -pen,  $\text{SnN}_2\text{C}_2$ -oppo,  $\text{SnN}_3\text{C}_1$ -O and  $\text{SnN}_1\text{C}_3$ -O at  $T = 298.15$  K,  $pH = 0$ , and  $U = 0$  V.

| Elementary reactions                                                              | $\text{SnN}_2\text{C}_2$ -hex | $\text{SnN}_2\text{C}_2$ -pen | $\text{SnN}_2\text{C}_2$ -oppo |
|-----------------------------------------------------------------------------------|-------------------------------|-------------------------------|--------------------------------|
| $\text{OOH}^*+\text{H}^++e^- \rightarrow \text{O}^*+\text{H}_2\text{O}(\text{l})$ | -2.08                         | -1.73                         | -2.75                          |

|                                                                                                |                                   |                                   |      |
|------------------------------------------------------------------------------------------------|-----------------------------------|-----------------------------------|------|
| $\text{OOH}^* + \text{H}^+ + \text{e}^- \rightarrow \text{H}_2\text{O}_2 + ^*$                 | -0.34                             | -0.03                             | 0.18 |
| <b>Elementary reactions</b>                                                                    | $\text{SnN}_3\text{C}_1\text{-O}$ | $\text{SnN}_1\text{C}_3\text{-O}$ |      |
| $\text{OOH}^* + \text{H}^+ + \text{e}^- \rightarrow \text{O}^* + \text{H}_2\text{O}(\text{l})$ | -1.38                             | -1.17                             |      |
| $\text{OOH}^* + \text{H}^+ + \text{e}^- \rightarrow \text{H}_2\text{O}_2 + ^*$                 | 0.46                              | 1.11                              |      |

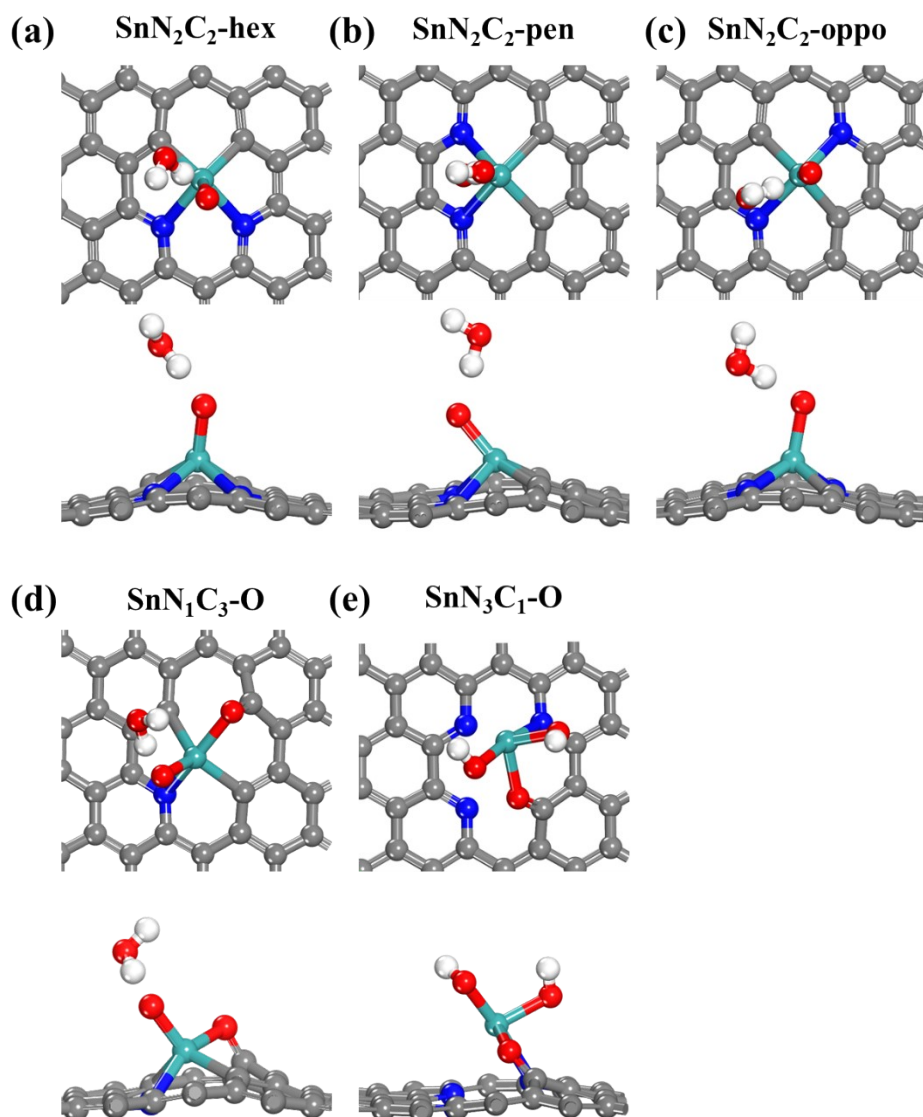

Figure S4. Top and side view of atomic structure of relaxed geometries for spontaneously dissociated  $\text{H}_2\text{O}_2$  on the center Sn atom of the  $\text{SnN}_2\text{C}_2\text{-hex}$  (a),  $\text{SnN}_2\text{C}_2\text{-pen}$  (b),  $\text{SnN}_2\text{C}_2\text{-oppo}$  (c),  $\text{SnN}_1\text{C}_3\text{-O}$  (d), and  $\text{SnN}_3\text{C}_1\text{-O}$  (e). The gray, blue, wathet and red balls represent C, N, Sn and O atoms, respectively.

(a) OH\*-assisted associative pathway

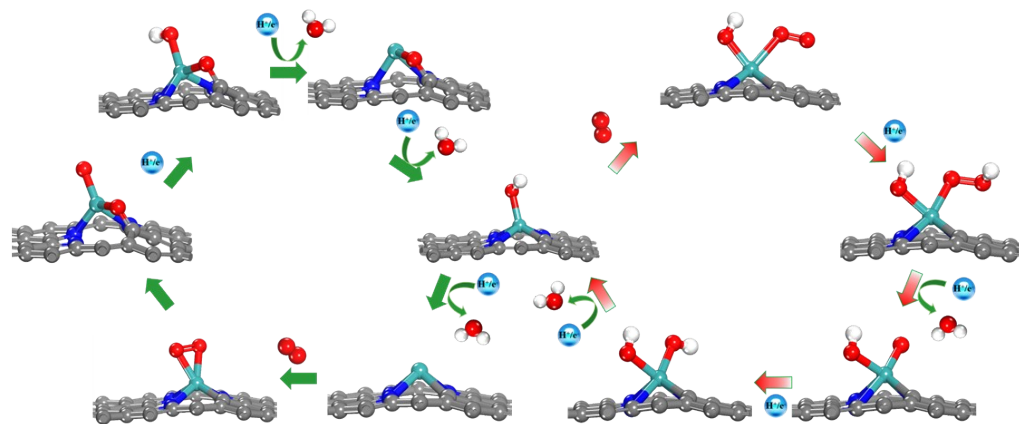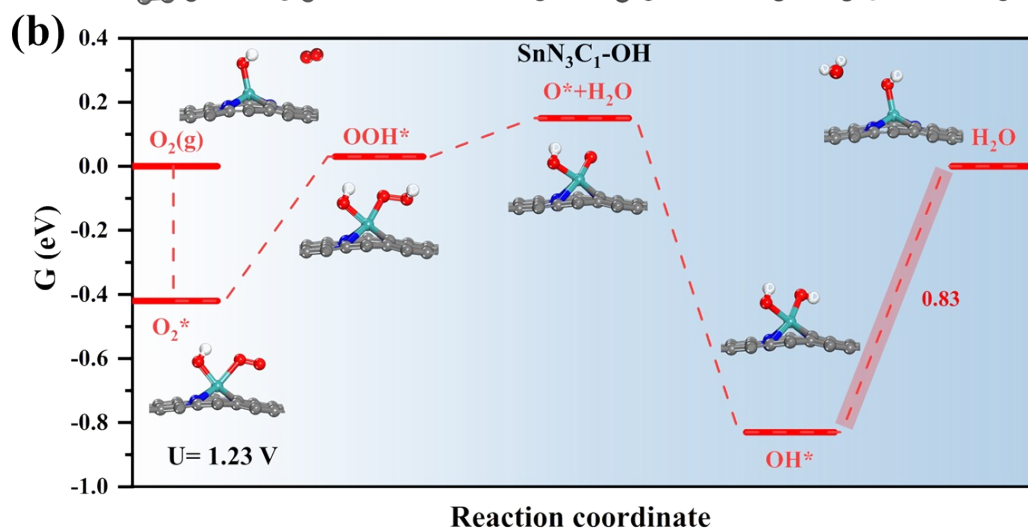

Figure S5. The OH\*-assisted associative pathway (red) on the SnN<sub>3</sub>C<sub>1</sub> (a) and the corresponding Gibbs free energy diagram at  $U = 1.23$  V (b).

**(a) O<sup>\*</sup>-assisted associative pathway**

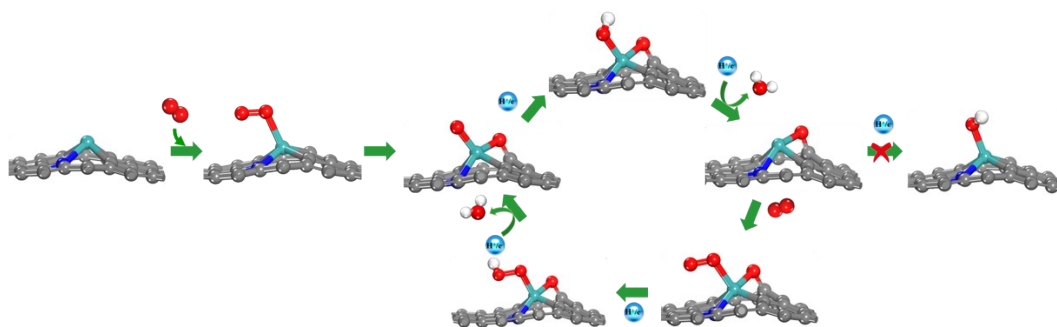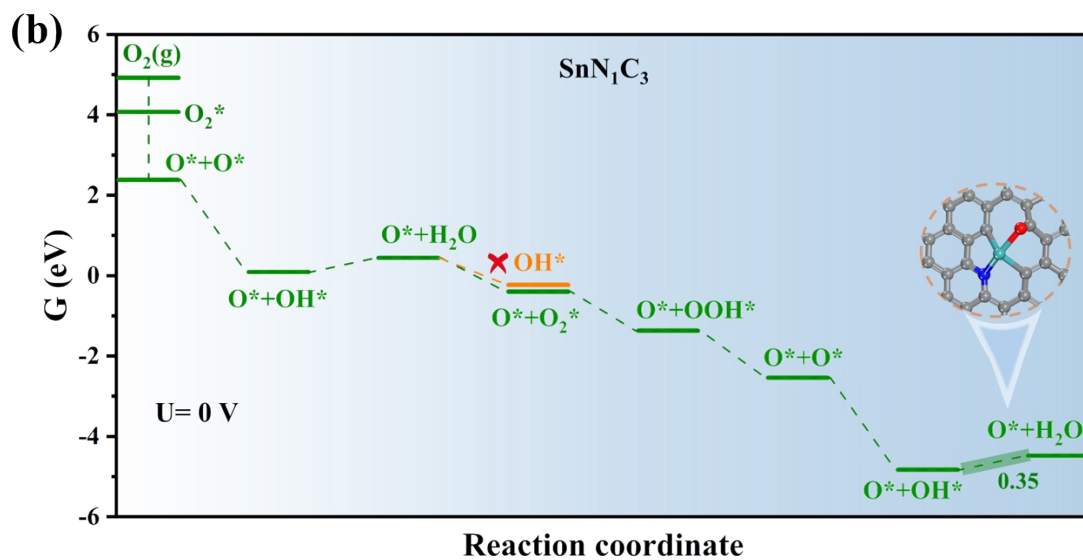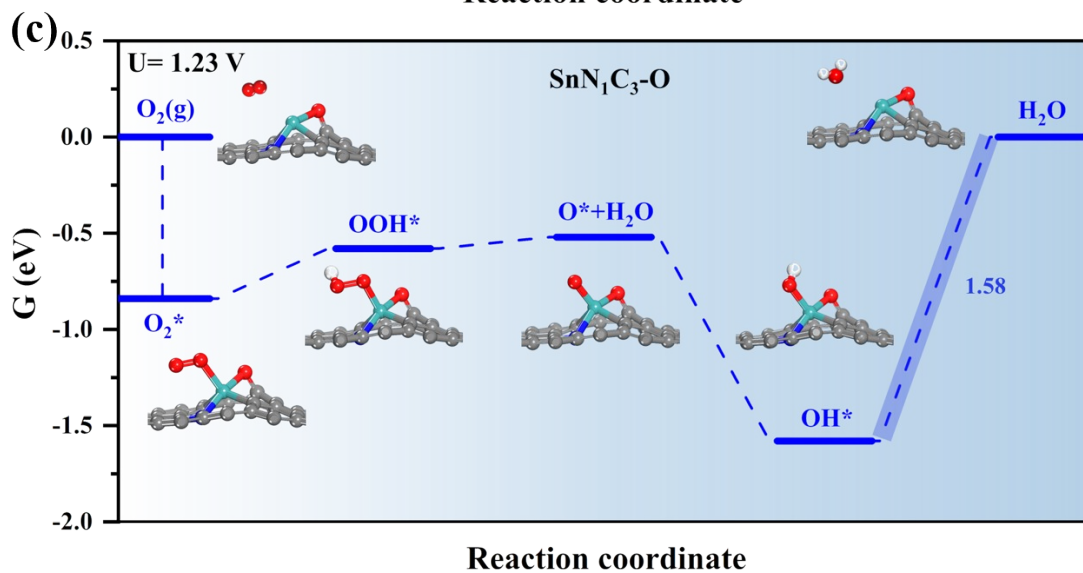

Figure S6. The O<sup>\*</sup>-assisted associative pathway on the SnN<sub>1</sub>C<sub>3</sub> (a) and the corresponding Gibbs free energy diagram at  $U = 0$  V (b) and  $U = 1.23$  V (c).



Table S5. Reaction energetics (eV) for the 4e<sup>-</sup> transfer processes during ORR on SnN<sub>2</sub>C<sub>2</sub>-hex, SnN<sub>2</sub>C<sub>2</sub>-pen and SnN<sub>2</sub>C<sub>2</sub>-oppo at  $T = 298.15$  K,  $pH = 0$ , and  $U = 1.23$  V.

| Elementary reactions                    | SnN <sub>2</sub> C <sub>2</sub> -hex | SnN <sub>2</sub> C <sub>2</sub> -pen | SnN <sub>2</sub> C <sub>2</sub> -oppo |
|-----------------------------------------|--------------------------------------|--------------------------------------|---------------------------------------|
| $O_2(g)+* \rightarrow O_2^*$            | -0.08                                | -0.41                                | -0.47                                 |
| $O_2^*+H^++e^- \rightarrow OOH^*$       | 0.24                                 | 0.27                                 | 0.12                                  |
| $OOH^*+H^++e^- \rightarrow O^*+H_2O(l)$ | -0.85                                | -0.50                                | -1.52                                 |
| $O^*+H^++e^- \rightarrow OH^*$          | -0.13                                | -0.45                                | 0.82                                  |
| $OH^*+H^++e^- \rightarrow H_2O^*$       | 0.81                                 | 1.09                                 | 1.05                                  |

Table S6. Reaction energetics (eV) for the 4e<sup>-</sup> transfer processes during ORR on SnN<sub>4</sub> and SnC<sub>4</sub> at  $T = 298.15$  K,  $pH = 0$ , and  $U = 1.23$  V.

| Elementary reactions                   | SnN <sub>4</sub> | Elementary reactions                       | SnC <sub>4</sub> |
|----------------------------------------|------------------|--------------------------------------------|------------------|
| $O_2(g)+* \rightarrow O_2^*$           | 0.04             | $O_2(g)+* \rightarrow O_2^*$               | -0.40            |
| $O_2^* \rightarrow O^*+O^*$            | -0.32            | $O_2^* \rightarrow O^*+O^*$                | -1.38            |
| $O^*+O^*+H^++e^- \rightarrow OH^*+O^*$ | -0.52            | $O^*+O^*+H^++e^- \rightarrow OH^*+O^*$     | -1.06            |
| $OH^*+O^*+H^++e^- \rightarrow 2OH^*$   | -0.66            | $OH^*+O^*+H^++e^- \rightarrow H_2O(l)+O^*$ | 1.30             |
| $2OH^*+H^++e^- \rightarrow OH^*+H_2O$  | 1.28             | $O^*+H^++e^- \rightarrow OH^*$             | 0.42             |
| $OH^*+H^++e^- \rightarrow H_2O+*$      | 0.18             | $OH^*+H^++e^- \rightarrow H_2O+*$          | 1.12             |

Table S7. Reaction energetics (eV) for the 4e<sup>-</sup> transfer processes during ORR on SnN<sub>3</sub>C<sub>1</sub>-O and SnN<sub>1</sub>C<sub>3</sub>-O at  $T = 298.15$  K,  $pH = 0$ , and  $U = 1.23$  V, respectively.

| Elementary reactions                    | SnN <sub>3</sub> C <sub>1</sub> -O | SnN <sub>1</sub> C <sub>3</sub> -O |
|-----------------------------------------|------------------------------------|------------------------------------|
| $O_2(g) \rightarrow O_2^*$              | -0.34                              | -0.84                              |
| $O_2^*+H^++e^- \rightarrow OOH^*$       | 0.40                               | 0.26                               |
| $OOH^*+H^++e^- \rightarrow O^*+H_2O(l)$ | -0.15                              | 0.06                               |
| $O^*+H^++e^- \rightarrow OH^*$          | -0.00                              | -1.06                              |
| $OH^*+H^++e^- \rightarrow H_2O^*$       | 0.09                               | 1.58                               |

Table S8. Reaction energetics (eV) for the 4e<sup>-</sup> transfer processes during ORR on SnN<sub>3</sub>C<sub>1</sub>-O at  $T = 298.15$  K,  $pH = 0$ , and  $U = 1.23$  V in different media, vacuum, implicit solvation, explicit solvation.

| Elementary reactions                          | vacuum | implicit | explicit |
|-----------------------------------------------|--------|----------|----------|
| $O_2(g) \rightarrow O_2^*$                    | -0.34  | -0.62    | 0.05     |
| $O_2^* + H^+ + e^- \rightarrow OOH^*$         | 0.40   | 0.48     | 0.18     |
| $OOH^* + H^+ + e^- \rightarrow O^* + H_2O(l)$ | -0.15  | -0.32    | -1.25    |
| $O^* + H^+ + e^- \rightarrow OH^*$            | -0.00  | 0.24     | 0.43     |
| $OH^* + H^+ + e^- \rightarrow H_2O^*$         | 0.09   | 0.21     | 0.59     |

Table S9. The zero-point energy (ZPE) and the entropy change ( $T^*S$ ) of free molecules and the ORR intermediates for the 7 SnNC catalysts.

| Gas molecules                  |                  |                                      |                                      |                                       |                                    |                                    |
|--------------------------------|------------------|--------------------------------------|--------------------------------------|---------------------------------------|------------------------------------|------------------------------------|
| T=298.15K                      | H <sub>2</sub> O | ZPE                                  | 0.56                                 | H <sub>2</sub>                        | ZPE                                | 0.27                               |
|                                |                  | TS                                   | 0.67                                 |                                       | TS                                 | 0.41                               |
| The different catalysts (SnNC) |                  |                                      |                                      |                                       |                                    |                                    |
|                                |                  | SnN <sub>2</sub> C <sub>2</sub> -hex | SnN <sub>2</sub> C <sub>2</sub> -pen | SnN <sub>2</sub> C <sub>2</sub> -oppo | SnN <sub>3</sub> C <sub>1</sub> -O | SnN <sub>1</sub> C <sub>3</sub> -O |
| O <sub>2</sub> *               | ZPE              | 0.13                                 | 0.11                                 | 0.12                                  | 0.13                               | 0.11                               |
|                                | TS               | 0.14                                 | 0.10                                 | 0.18                                  | 0.12                               | 0.09                               |
| OOH*                           | ZPE              | 0.45                                 | 0.43                                 | 0.38                                  | 0.46                               | 0.45                               |
|                                | TS               | 0.19                                 | 0.22                                 | 0.11                                  | 0.20                               | 0.18                               |
| O*                             | ZPE              | 0.10                                 | 0.10                                 | 0.10                                  | 0.12                               | 0.11                               |
|                                | TS               | 0.03                                 | 0.03                                 | 0.03                                  | 0.04                               | 0.04                               |
| OH*                            | ZPE              | 0.35                                 | 0.33                                 | 0.36                                  | 0.37                               | 0.36                               |
|                                | TS               | 0.12                                 | 0.10                                 | 0.10                                  | 0.11                               | 0.11                               |
|                                |                  | SnN <sub>4</sub>                     |                                      |                                       | SnC <sub>4</sub>                   |                                    |
| O <sub>2</sub> *               | ZPE              | 0.12                                 | O <sub>2</sub> *                     | ZPE                                   | 0.11                               |                                    |
|                                | TS               | 0.17                                 |                                      | TS                                    | 0.10                               |                                    |
| O*+O*                          | ZPE              | 0.15                                 | O*+O*                                | ZPE                                   | 0.15                               |                                    |

|               |     |      |               |     |      |  |
|---------------|-----|------|---------------|-----|------|--|
|               | TS  | 0.12 |               | TS  | 0.12 |  |
| <b>O*+OH*</b> | ZPE | 0.44 | <b>O*+OH*</b> | ZPE | 0.45 |  |
|               | TS  | 0.14 |               | TS  | 0.15 |  |
| <b>2OH*</b>   | ZPE | 0.71 | <b>O*</b>     | ZPE | 0.10 |  |
|               | TS  | 0.20 |               | TS  | 0.03 |  |
| <b>OH*</b>    | ZPE | 0.33 | <b>OH*</b>    | ZPE | 0.42 |  |
|               | TS  | 0.13 |               | TS  | 0.05 |  |

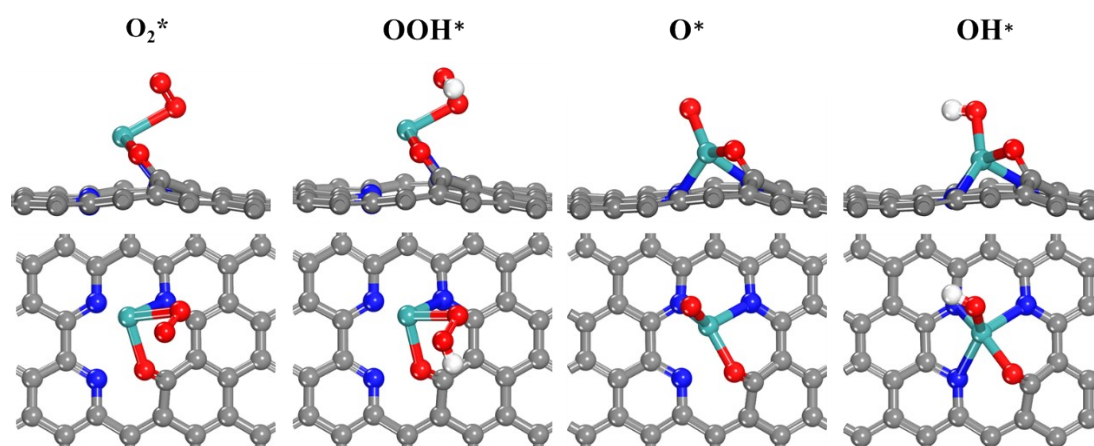

Figure S7. Top and side view of relaxed geometries for  $O_2^*$ ,  $OOH^*$ ,  $O^*$  and  $OH^*$  adsorption on the center Sn atom of  $SnN_3C_1-O$  under implicit solvation model.

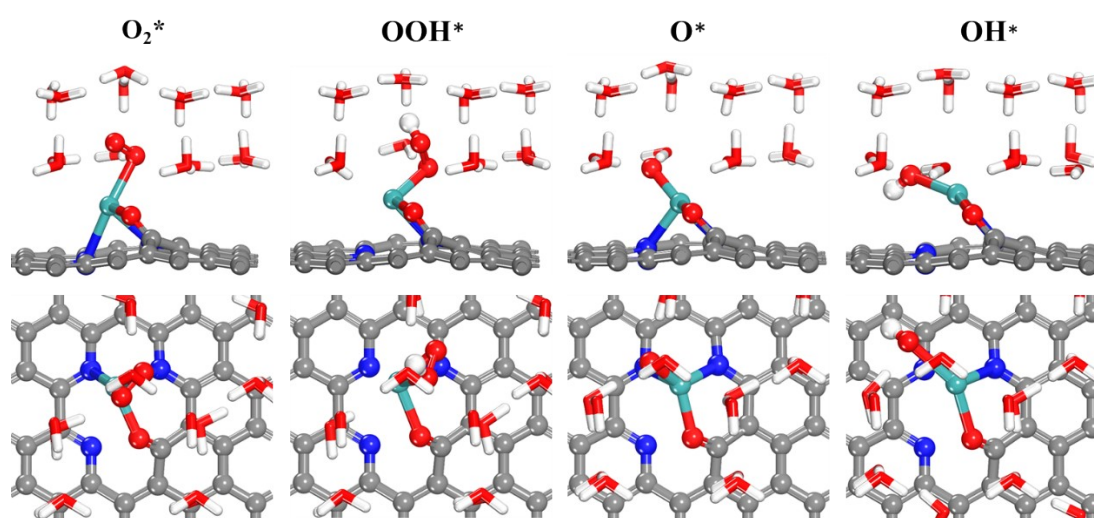

Figure S8. Top and side view of relaxed geometries for  $O_2^*$ ,  $OOH^*$ ,  $O^*$ , and  $OH^*$  adsorption on the center Sn atom of  $SnN_3C_1-O$  under explicit solvation model.

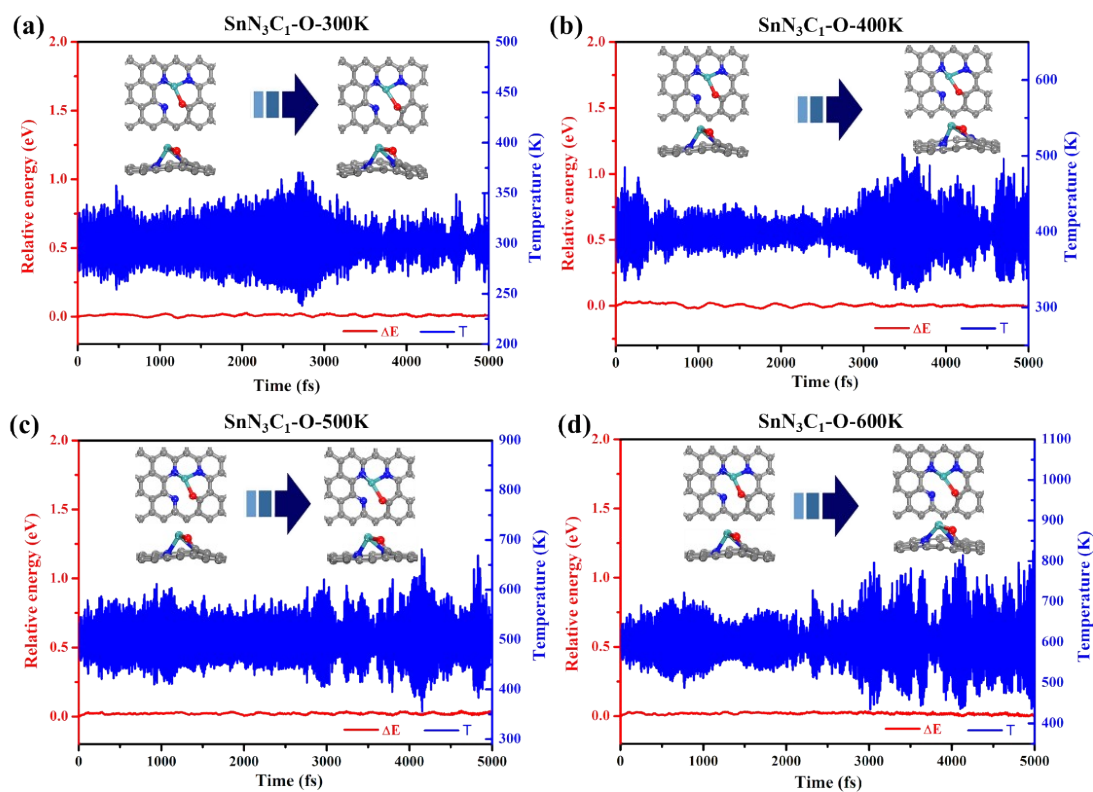

Figure S9. In the AIMD simulation, the time step is 1fs and AIMD simulation of  $\text{SnN}_3\text{C}_1\text{-O}$  catalyst is performed at 300K (a), 400K (b), 500K (c), and 600K (d) for 5 ps. Here, the electronic energy of the initial configuration is set to zero for reference.
